# Supplementary material for: A type VII-secreted lipase toxin with reverse domain arrangement
Source: Springer Nature journal article supplement (doi:10.1038/s41467-023-44221-y), 2023-12-19
Supplement: MOESM1 [file 41467_2023_44221_MOESM1_ESM.pdf]

## **Supplementary Information:**

### **A type VII-secreted lipase toxin with reverse domain arrangement**

#### **Supplementary Figures**

Supplementary Fig. 1. SAOUHSC\_00406/TslA has a polymorphic N-terminal region.  
Supplementary Fig. 2. Two further homologues of TslA can be encoded in *S. aureus* genomes.  
Supplementary Fig. 3. The split nanoluciferase assay indicates that TslA is detected in the culture supernatant when co-produced with TlaA1 and TlaA2.  
Supplementary Fig. 4. The raw data for the split nanoluciferase assays presented in Fig. 1e and Supplementary Fig 3.  
Supplementary Fig. 5. Bacterial two-hybrid analysis of the four proteins encoded at the *tslA* cluster.  
Supplementary Fig. 6. TslA and its isolated N-terminal domain have lipase activity against the model lipid substrate Tween 20.  
Supplementary Fig. 7. *S. aureus* strains encode three DUF576 tandem lipoprotein (Til1) islands and one orphan Til1.  
Supplementary Fig. 8. The TilA immunity protein inhibits TslA lipase activity.  
Supplementary Fig. 9. TslA and catalytically inactive variants are produced at similar levels in USA300 strains.  
Supplementary Fig. 10. Uncropped Western blots.  
Supplementary Fig. 11. Cryo-EM processing workflow, showing local and global map quality.

#### **Supplementary Tables**

Supplementary Table 1. Analysis of Tsl1 distribution in *S. aureus* genomes.  
Supplementary Table 2. Analysis of *S. aureus* USA300 cells stained by Sytox green when imaged using fluorescence microscopy.  
Supplementary Table 3. Bacterial strains used in this work.  
Supplementary Table 4. Plasmids used in this work.  
Supplementary Table 5. Protein expression and purification conditions used in this work.

#### **Supplementary References**

SAOUHSC\_00406/1-442 1 ----MLSRKYKIDLKAINQNTTESTSAISKASYEVENANNGLSKRDVINCFNDLKKMKKF

WP\_110228616.1/1-441 1 ----MKDKYKIDPGIKNNTTEETAISKISYEVENANLYGADSEDIRTQIEYLRKAKKFF

WP\_001581953.1/1-441 1 ----MKDKYKIDPGIKNNTTEETAISKISYEVENANLYGADSEDIRTQIEYLRKAKKFF

WP\_064140200.1/1-441 1 ----MKDKYKIDPGIKNNTTEETAISKISYEVENANLYGADSEDIRTQIEYLRKAKKFF

WP\_165794351.1/1-428 1 -----NNTEETAISKISYEVENANLYGADSEDIRTQIEYLRKAKKFF

WP\_258414049.1/1-441 1 ----MKDKYKIDPGPIKYNTTEETAISKISYEVENAKLYGKSTIGRQIDQLBEAKKFF

WP\_078370638.1/1-442 1 ----MLSKNYKIDKLNKAVNSKTESTSAISKASYEVENANNGLTQKDLRTQINTLNKAKKFF

WP\_241010539.1/1-446 1 MKVKILSKNYKIDKLNKAVNSKTESTSAISKASYEVENANNGLTQKDLRTQINTLNKAKKFF

WP\_162665452.1/1-442 1 ----MLSSKKKIDLKAMNQNTTESTSGISKASYEVENANNGLSKRDVINCFNDLKKMKKF

WP\_248313758.1/1-442 1 ----MLSRKYKIDLKAINQNTTESTSAISKASYEVENANNGLSKRDVINCFNDLKKMKKF

WP\_084986278.1/1-442 1 ----MLSRKYKIDLKAINQNTTESTSAISKASYEVENANNGLSKRDVINCFNDLKKMKKF

WP\_098691688.1/1-442 1 ----MLSRKYKIDLKAINQNTTESTSAISKASYEVENANNGLSKRDVINCFNDLKKMKKI

WP\_086045600.1/1-442 1 ----MLSRKYKIDLKAINQNTTESTSAISKASYEVENANNGLSKRDEINCFNDLKKMKKF

WP\_031889785.1/1-430 1 -----INQNTTESTSAISKASYEVENANNGLSKRDVINCFNDLKKMKKF

SAOUHSC\_00406/1-442 57 PSNLEWVDSYTDSLTGVTTSFAFLNKDTGKVTGLGMTGTNIQGEAFKKLKEGEFSRQNVNA

WP\_110228616.1/1-441 56 PSNLEWVDSYTDSLTGVTTSFAFLNKDTGKVTGLGMTGTNIQGEAFKKLKEGEFSRQNVNA

WP\_001581953.1/1-441 56 PSNLEWVDSYTDSEFNGVTTSFAFLNKDTGKVTGLGMTGTNIQGEAFKKLKEGEFSRQNVNA

WP\_064140200.1/1-441 56 PSNLEWVDSYTDSEFNGVTTSFAFLNKDTGKVTGLGMTGTNIQGEAFKKLKEGEFSRQNVNA

WP\_165794351.1/1-428 43 PSNLEWVDSYTDSEFNGVTTSFAFLNKDTGKVTGLGMTGTNIQGEAFKKLKEGEFSRQNVNA

WP\_258414049.1/1-441 56 PSNLEWVDSYTDSEFNGVTTSFAFLNKDTGKVTGLGMTGTNIQGEAFKKLKEGEFSRQNVNA

WP\_078370638.1/1-442 57 PSNLEWVDSYTDSEFNGVTTSFAFLNKDTGKVTGLGMTGTNIQGEAFKKLKEGEFSRQNVNA

WP\_241010539.1/1-446 61 PSNLEWVDSYTDSEFNGVTTSFAFLNKDTGKVTGLGMTGTNIQGEAFKKLKEGEFSRQNVNA

WP\_084986278.1/1-442 57 PSNLEWVDSYTDSEFNGVTTSFAFLNKDTGKVTGLGMTGTNIQGEAFKKLKEGEFSRQNVNA

WP\_162665452.1/1-442 57 PSNLEWVDSYTDSEFNGVTTSFAFLNKDTGKVTGLGMTGTNIQGEAFKKLKEGEFSRQNVNA

WP\_248313758.1/1-442 57 PSNLEWVDSYTDSEFNGVTTSFAFLNKDTGKVTGLGMTGTNIQGEAFKKLKEGEFSRQNVNA

WP\_084986278.1/1-442 57 PSNLEWVDSYTDSEFNGVTTSFAFLNKDTGKVTGLGMTGTNIQGEAFKKLKEGEFSRQNVNA

WP\_098691688.1/1-442 57 PSNLEWVDSYTDSEFNGVTTSFAFLNKDTGKVTGLGMTGTNIQGEAFKKLKEGEFSRQNVNA

WP\_086045600.1/1-442 57 PSNLEWVDSYTDSEFNGVTTSFAFLNKDTGKVTGLGMTGTNIQGEAFKKLKEGEFSRQNVNA

WP\_031889785.1/1-430 45 PSNLEWVDSYTDSEFNGVTTSFAFLNKDTGKVTGLGMTGTNIQGEAFKKLKEGEFSRQNVNA

SAOUHSC\_00406/1-442 117 LETVKDGYADIKILYSPASDQNYRYANTQEFINKIKSKYDIDFITGHSLGGRDAVVLGMS

WP\_110228616.1/1-441 116 LETVKDGYADIKILYSVLLQKRYRYANTQEFINKIKSKYDIDFITGHSLGGRDAVVLGMS

WP\_001581953.1/1-441 116 LETVKDGYADIKILYSPASDQNYRYANTQEFINKIKSKYDIDFITGHSLGGRDAVVLGMS

WP\_064140200.1/1-441 116 LETVKDGYADIKILYSPASDQNYRYANTQEFINKIKSKYDIDFITGHSLGGRDAVVLGMS

WP\_165794351.1/1-428 103 LETVKDGYADIKILYSPASDQNYRYANTQEFINKIKSKYDIDFITGHSLGGRDAVVLGMS

WP\_258414049.1/1-441 116 LETVKDGYADIKILYSPASDQNYRYANTQEFINKIKSKYDIDFITGHSLGGRDAVVLGMS

WP\_078370638.1/1-442 117 LETVKDGYADIKILYSPASDQNYRYANTQEFINKIKSKYDIDFITGHSLGGRDAVVLGMS

WP\_241010539.1/1-446 121 LETVKDGYADIKILYSPASDQNYRYANTQEFINKIKSKYDIDFITGHSLGGRDAVVLGMS

WP\_162665452.1/1-442 117 LETVKDGYADIKILYSPASDQNYRYANTQEFINKIKSKYDIDFITGHSLGGRDAVVLGMS

WP\_248313758.1/1-442 117 LETVKDGYADIKILYSPASDQNYRYANTQEFINKIKSKYDIDFITGHSLGGRDAVVLGMS

WP\_084986278.1/1-442 117 LETVKDGYADIKILYSPASDQNYRYANTQEFINKIKSKYDIDFITGHSLGGRDAVVLGMS

WP\_098691688.1/1-442 117 LETVKDGYADIKILYSPASDQNYRYANTQEFINKIKSKYDIDFITGHSLGGRDAVVLGMS

WP\_086045600.1/1-442 117 LETVKDGYADIKILYSPASDQNYRYANTQEFINKIKSKYDIDFITGHSLGGRDAVVLGMS

WP\_031889785.1/1-430 105 LETVKDGYADIKILYSPASDQNYRYANTQEFINKIKSKYDIDFITGHSLGGRDAVVLGMS

SAOUHSC\_00406/1-442 177 NGIPNIVVYNPAPISITSLNPNSPDGKRLLELYKNYKGNITRFVAENDALTENLKKYKH

WP\_110228616.1/1-441 176 NGIPNIVVYNPAPISITSLNPNSPDGKRLLELYKNYKGNITRFVAENDALTENLKKYKH

WP\_001581953.1/1-441 176 NGIPNIVVYNPAPISITSLNPNSPDGKRLLELYKNYKGNITRFVAENDALTENLKKYKH

WP\_064140200.1/1-441 176 NGIPNIVVYNPAPISITSLNPNSPDGKRLLELYKNYKGNITRFVAENDALTENLKKYKH

WP\_165794351.1/1-428 163 NGIPNIVVYNPAPISITSLNPNSPDGKRLLELYKNYKGNITRFVAENDALTENLKKYKH

WP\_258414049.1/1-441 176 NGIPNIVVYNPAPISITSLNPNSPDGKRLLELYKNYKGNITRFVAENDALTENLKKYKH

WP\_078370638.1/1-442 177 NGIPNIVVYNPAPISITSLNPNSPDGKRLLELYKNYKGNITRFVAENDALTENLKKYKH

WP\_241010539.1/1-446 181 NGIPNIVVYNPAPISITSLNPNSPDGKRLLELYKNYKGNITRFVAENDALTENLKKYKH

WP\_162665452.1/1-442 177 NGIPNIVVYNPAPISITSLNPNSPDGKRLLELYKNYKGNITRFVAENDALTENLKKYKH

WP\_248313758.1/1-442 177 NGIPNIVVYNPAPISITSLNPNSPDGKRLLELYKNYKGNITRFVAENDALTENLKKYKH

WP\_084986278.1/1-442 177 NGIPNIVVYNPAPISITSLNPNSPDGKRLLELYKNYKGNITRFVAENDALTENLKKYKH

WP\_098691688.1/1-442 177 NGIPNIVVYNPAPISITSLNPNSPDGKRLLELYKNYKGNITRFVAENDALTENLKKYKH

WP\_086045600.1/1-442 177 NGIPNIVVYNPAPISITSLNPNSPDGKRLLELYKNYKGNITRFVAENDALTENLKKYKH

WP\_031889785.1/1-430 165 NGIPNIVVYNPAPISITSLNPNSPDGKRLLELYKNYKGNITRFVAENDALTENLKKYKH

SAOUHSC\_00406/1-442 237 VFFGNDKVFKNKGHEMEGFLTEEBQKAIKKELKKLOGYAEENNSFVKNSNNAISKLAS

WP\_110228616.1/1-441 236 VFFGNDKVFKNKGHEMEGFLTEEBQKAIKKELKKLOGYAEENNSFVKNSNNAISKLAS

WP\_001581953.1/1-441 236 VFFGNDKVFKNKGHEMEGFLTEEBQKAIKKELKKLOGYAEENNSFVKNSNNAISKLAS

WP\_064140200.1/1-441 236 VFFGNDKVFKNKGHEMEGFLTEEBQKAIKKELKKLOGYAEENNSFVKNSNNAISKLAS

WP\_165794351.1/1-428 223 VFFGNDKVFKNKGHEMEGFLTEEBQKAIKKELKKLOGYAEENNSFVKNSNNAISKLAS

WP\_258414049.1/1-441 236 VFFGNDKVFKNKGHEMEGFLTEEBQKAIKKELKKLOGYAEENNSFVKNSNNAISKLAS

WP\_078370638.1/1-442 237 VFFGNDKVFKNKGHEMEGFLTEEBQKAIKKELKKLOGYAEENNSFVKNSNNAISKLAS

WP\_241010539.1/1-446 241 VFFGNDKVFKNKGHEMEGFLTEEBQKAIKKELKKLOGYAEENNSFVKNSNNAISKLAS

WP\_162665452.1/1-442 237 VFFGNDKVFKNKGHEMEGFLTEEBQKAIKKELKKLOGYAEENNSFVKNSNNAISKLAS

WP\_248313758.1/1-442 237 VFFGNDKVFKNKGHEMEGFLTEEBQKAIKKELKKLOGYAEENNSFVKNSNNAISKLAS

WP\_084986278.1/1-442 237 VFFGNDKVFKNKGHEMEGFLTEEBQKAIKKELKKLOGYAEENNSFVKNSNNAISKLAS

WP\_098691688.1/1-442 237 VFFGNDKVFKNKGHEMEGFLTEEBQKAIKKELKKLOGYAEENNSFVKNSNNAISKLAS

WP\_086045600.1/1-442 237 VFFGNDKVFKNKGHEMEGFLTEEBQKAIKKELKKLOGYAEENNSFVKNSNNAISKLAS

WP\_031889785.1/1-430 225 VFFGNDKVFKNKGHEMEGFLTEEBQKAIKKELKKLOGYAEENNSFVKNSNNAISKLAS

**Supplementary Fig. 1. SAOUHSC\_00406/TsIA has a polymorphic N-terminal region.** TsIA homologues were identified by a blast search against the RefSeq database. The first 113 sequences were aligned using Muscle and visualised using Boxshade, with 13 representative sequences used to visualise the alignment of amino acids 1-296 of TsIA.

a.

```

SAOUHSC_02786 1 MSQTEYQIKSGNFKGNSEETSTVSNISYEIENANNNGSLKQNKIDKQIKKKLOEKNKFPSNL
SAOUHSC_00406 1 MLSRKYKIDLKAINQNTTESTSAISKASYEVENANNNGLSKRVDINQFNDLKMMKKFPPSNL

SAOUHSC_02786 61 SYLKSYYTDPKTGTTSFAFLNKDTGKVTLGMTGTNVHKDAILKQTFGVPSYQGYIDVSETL
SAOUHSC_00406 61 EYVDSYTDSTLGTGTTSAFLNKDTGKVTLGMTGTNLQDEAFKKLKEGEFSRONVTNALETV

SAOUHSC_02786 121 KDIGADVNI GLHSVTDKDPHYKNTODFIKNIKDYDIDITGHSLGGRDAMILGMSNDIK
SAOUHSC_00406 121 KDGADLKILYSPASDQNYRYANTQEFINKIKSKYDIDFITGHSLGGRDAVVLGMSNGIP

SAOUHSC_02786 181 HIVVYNPAPLAIKDVSGLYADQELKKLIEKYDGHIVRFVSDEDELDAVGRNH-LMETAG
SAOUHSC_00406 181 NIVVYNPAPISITSLNPNSPDGKRLELYKYNKGNITRFVAENDALTENLKYYKHVFFC

SAOUHSC_02786 240 EKIVLKNGBGHAMSGILMSRTCAIHLAELNKVKGQDENNKALKSVRKQTRHRLHKVETL
SAOUHSC_00406 241 NDKVKNGKGBHEMGEFLTEEECKAIKKELKKLQGYAEENKNSFVKNSNNAISKIASIELL

SAOUHSC_02786 300 RANWIQTGGSLSSSQQLLEALTALTIAEGLNQLVNEBSQHLKKCIT-----RW--
SAOUHSC_00406 301 RANMMTNGGGLSSSQQLVLESLTALTIAQSFSQLIDDEINQIKMYNEKKKKFGKNWED

SAOUHSC_02786 350 -----HIN-----LETTGKK-----RK
SAOUHSC_00406 361 AQKAGKAVGEDLSVNGVLNALDEGQVNESMVRPEQMISAKERQLSTIGSSVSNIYMRV

SAOUHSC_02786 362 KTEMKLVKN-----
SAOUHSC_00406 421 RLSINEIVDKQVLAQIGGLL

```

b.

```

Ts1A 1 MLSRKYKIDLKAINQNTTESTSAISKASYEVENANNNGLSKRVDINQFNDLKMMKKFPPSNL
Ts1B 1 MSQTEYQIKPGNIKANSEETSTVSKISYEIENANNNGSLKQKINKQIEGLKEEGKFPKNI
Ts1C 1 MFKNEYKIDPGKITSNTEATSAIANISYEIENANNNGLEKEKINGQINSLKNDGDFPPKNI

Ts1A 61 EYVDSYTDSTLGTGTTSAFLNKDTGKVTLGMTGTNLQDEAFKKLKEGE-----FSRONV
Ts1B 61 KVLKSYTDPNFGTITTAFLNKDTGKVTLGMTGTNLHFEEMGNVLKHP-----FNHSDDM
Ts1C 61 DYIDSYTDPSGTGTATAFLNKDTGKVTVGMACTNFHGDQLKRVALSSMSPLFPSPKQDM

Ts1A 114 TNALETVKDGYADLKILYSPASDQNYRYANTQEFINKIKSKYDIDFITGHSLGGRDAVVL
Ts1B 116 KDMKEMIKDFGADANIGLGAVTDKDPHFKDTODFIKDIKKEYEIDTITGHSLGGRDAIIL
Ts1C 121 RDVRGTMKDGADLALGVGMVNYKKGHFANTQOFLLENLQKYEIDTIVTGHSLGGRDAIFL

Ts1A 174 GMSNGHLENIVVYNPAPISITSL-----NPNSF--DGKRLELYKYNKGNITRFVA
Ts1B 176 GVSNDIKNIIVVYNPAPLSITDFRI----IALNNMTYSAIGDIEIKEMLKNNYNGHIVRFVS
Ts1C 181 GLRYNKNVVAYNPAPLEVKSIRDKFGGQLFRNTTFE--DEKYLKELMDNYDQDITKVIT

Ts1A 222 ENDAITENLKYYKHVFFENDKVFKNKGHEMGEFLTEEECKAIKKELKKLQGYAEENNK
Ts1B 232 DKDELDFVVSQFM-YDTAGEKIVLNGBGHDMGAFLRKYAQAHLAELRKVKGYEDANNK
Ts1C 239 QKGLDYLVKRTD-HLTCDVLRINNGQHAMENFLGEKEGRETIIEELMLVKGYRDANDK

Ts1A 282 SFVKNSNNAISKIASIELLRANMMTNG-G-SSSQQLVLESLTALTIAQSFSQLIDDEIN
Ts1B 291 SEKSVKDNTRSKLKGVEELRVNWLQANGAALTSSQLKLESVSALITAEGLSQLVKEESN
Ts1C 298 ASKALKKNTEKKLKGIDEIKSKLLQTNCA-SSSQQLLETLVAFSVAEGLSKMVDQRLQ

Ts1A 342 QIKMYNEKKKKFGKNWEDAOKAGKAVGEDLSVNGVLNALDEGQVNESMVRPEQMISA
Ts1B 351 QLEKMYDNMKDKFQENWKNQOEAGNKICTKLSDHGVLTALRNGDAYESKFETEELTKIEQ
Ts1C 358 QLKNNYENLMDKFEANWKDAQEASDIVCKHLSYPEKVSALDNGGVNESKLATEPHNETKD

Ts1A 402 KERQLSTIGSSVSNIYMRVRLSINEIVDKQVLAQIGGLL
Ts1B 411 KKLKELNDINSCHNYVSKIKDSVNAIVGNDOLLASQIAGVI
Ts1C 418 KLNKITDLSKKYNSYLQQIEKSIINEIVAKDQQLAGQIGDLI

```

**Supplementary Fig. 2. Two further homologues of Ts1A can be encoded in *S. aureus* genomes.** a. Alignment of Ts1A with pseudogenous homologue, SAOUHSC\_02786/Ts1B. b. Alignment of Ts1A with SAPIG\_RS13365/Ts1B and CO08\_0212/Ts1C. Residues indicated in red were mutated to alanine as part of this study. The G-X-S-X-G motif found in some type VI-secreted lipases is indicated by the red box. The putative G-X-L secretion motif is highlighted in green.

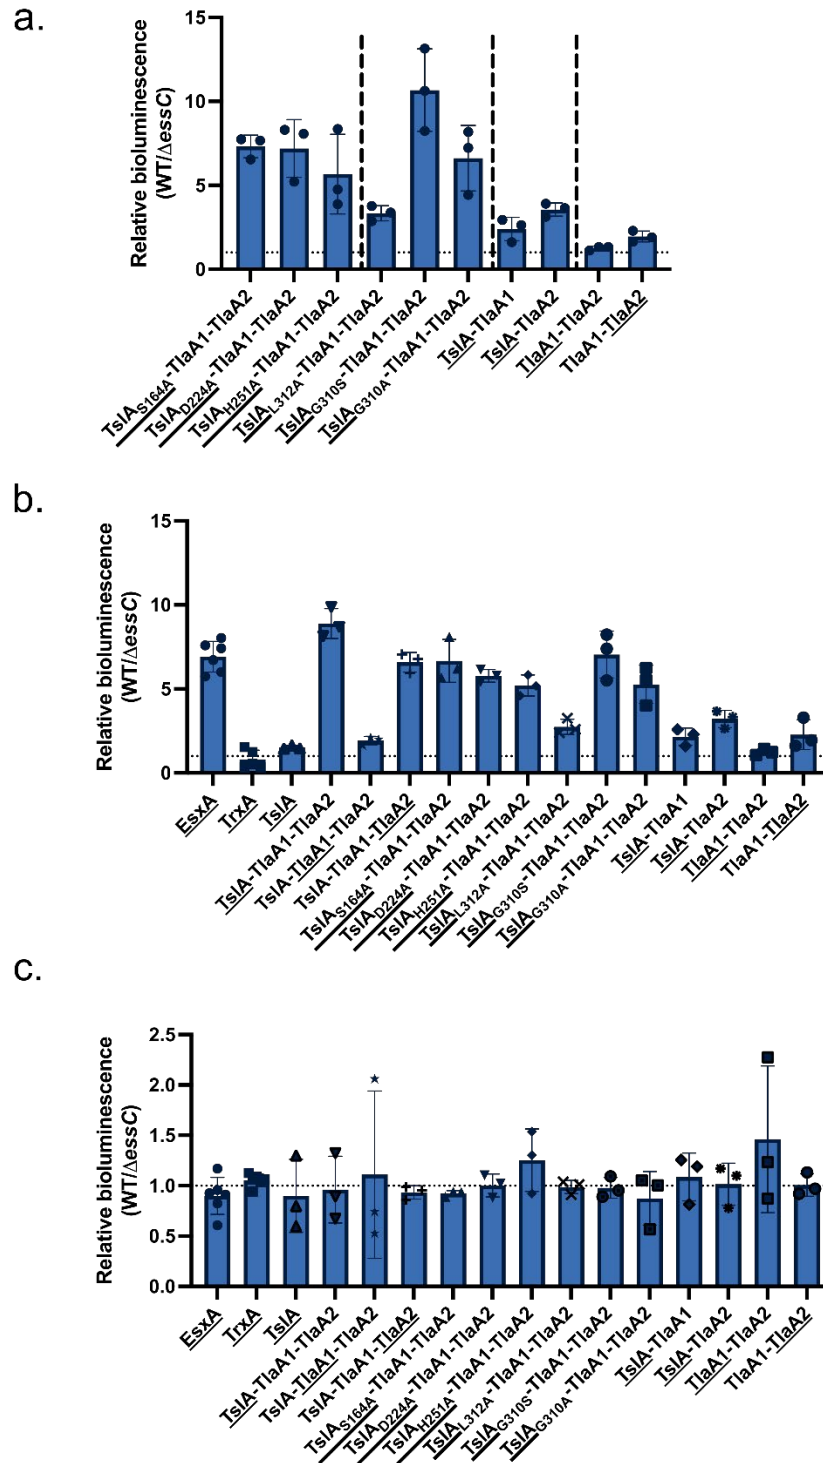

**Supplementary Fig. 3. The split nanoluciferase assay indicates that TsIA is detected in the culture supernatant when co-produced with TlaA1 and TlaA2.** a. The relative luminescence present in whole cell samples producing the indicated proteins. The underline denotes the protein to which the pep86 fragment was fused. b. and c. Whole cell samples from the same experiment as Fig. 1e were processed into b. supernatant and c. cytoplasmic fractions as described in the methods. 11S fragment of nanoluciferase and furimazine were added, and luminescence readings taken over a 10 min time course, with peak readings used to calculate relative bioluminescence for WT/ $\Delta$ essC. Experiments were performed in triplicate ( $n=3$ ). Data presented as the mean  $\pm$  SD. Two-way ANOVA was used to determine statistical

significance (n.s.  $p > 0.05$ ; \*\*\*\*  $p < 0.0001$ ). The experiment was performed a total of three to twelve times, dependent on the condition, all producing similar results.

a.

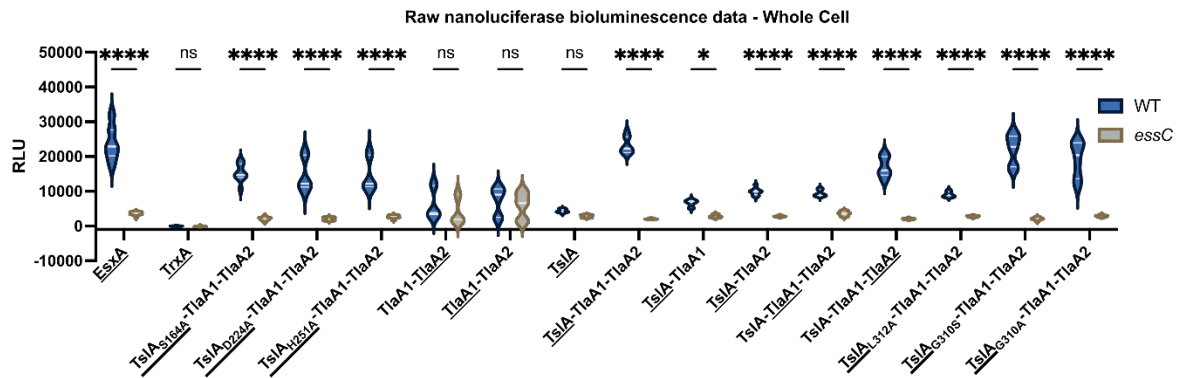

b.

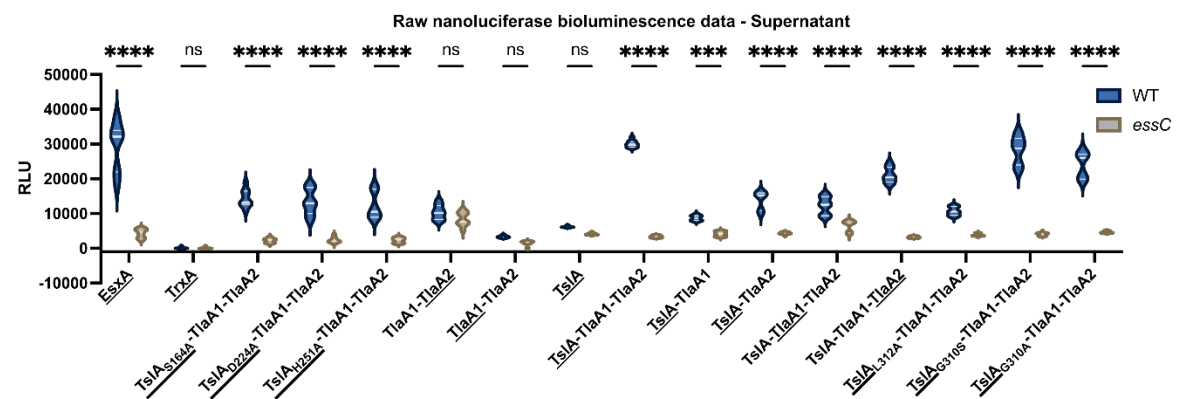

c.

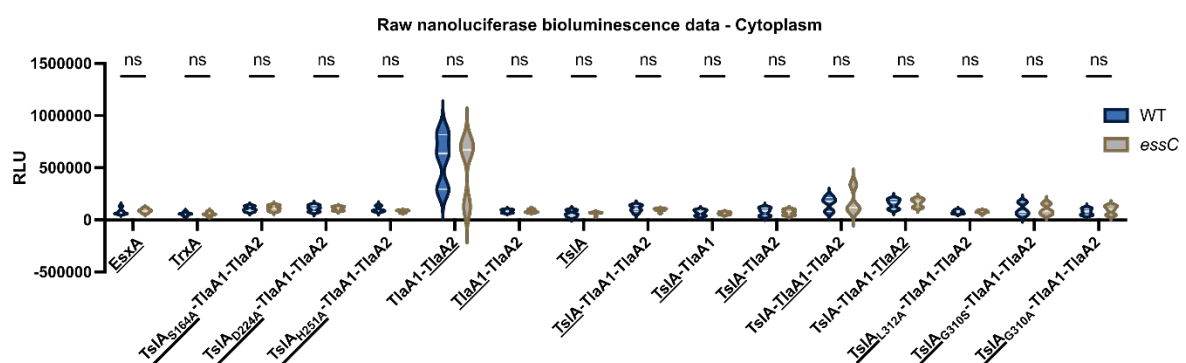

**Supplementary Fig. 4. The raw data for the split nanoluciferase assays presented in Fig. 1e and Supplementary Fig 3.** All normalised data for a. whole cell, b. supernatant and c. cytoplasmic fractions, used to represent the relative luciferase bioluminescence in previous figures, have been represented as violin plots.  $n=3$  biological replicates. Error bars are  $\pm$  SD. RLU – relative bioluminescence units.



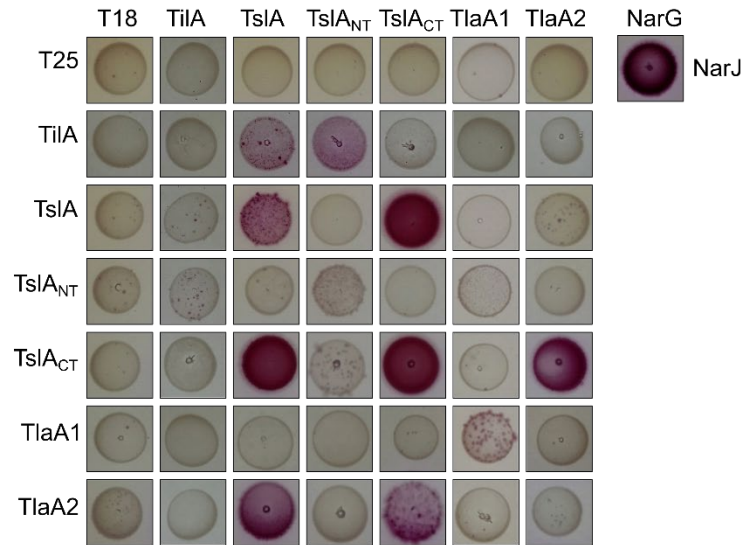

**Supplementary Fig. 5. Bacterial two-hybrid analysis of the four proteins encoded at the *tslA* cluster.** TiIA, TslA (full length and separated N- and C-terminal domains), TlaA1 and TlaA2 were produced as fusions to the T18 and T25 fragments of *Bordetella pertussis* CyaA and pairwise interactions scored in the *E. coli cyaA* mutant strain BTH101. BTH101 producing these fusions was plated onto MacConkey agar supplemented with 1% maltose, and plates were photographed after 40 hours at 30°C. NarG-T18 and T25-NarJ were used as a positive control<sup>15</sup>, and unfused T18 and T25 as a negative control. This experiment was repeated at least three times. Representative images are shown.

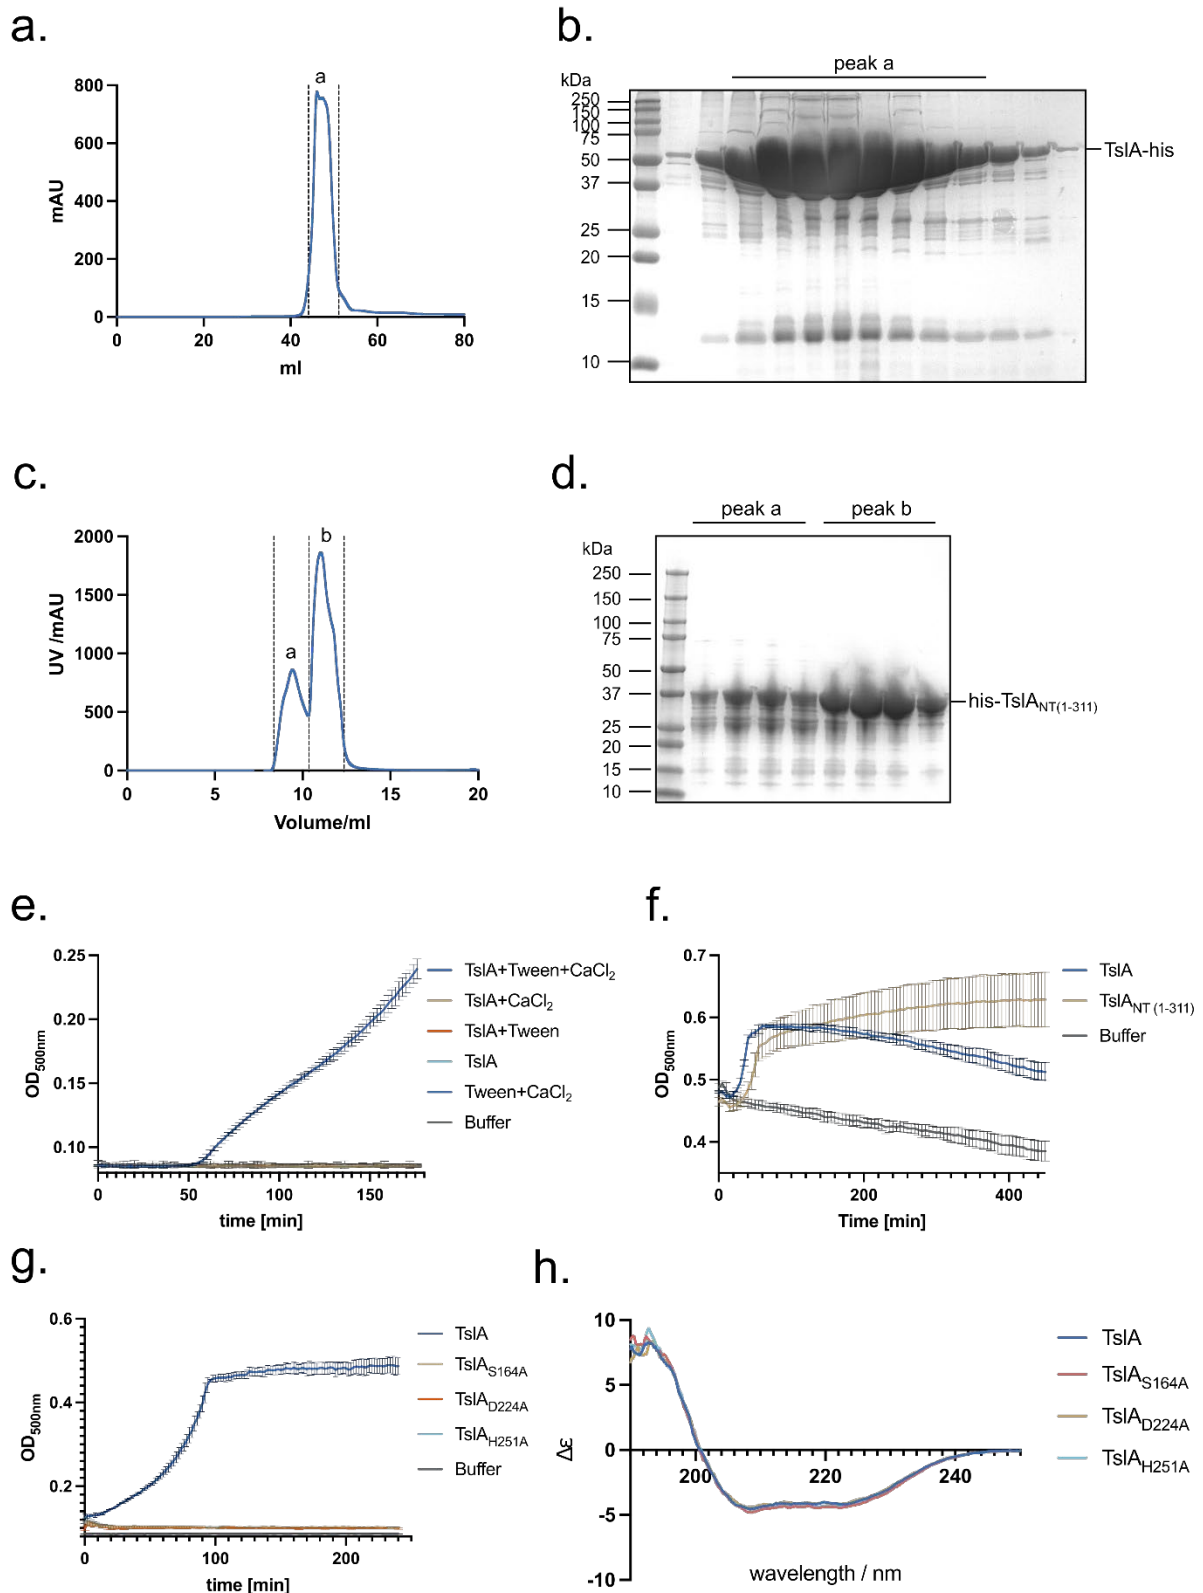

**Supplementary Fig. 6. TslA and its isolated N-terminal domain have lipase activity against the model lipid substrate Tween 20.** a. Size exclusion chromatogram of TslA-containing fractions that had been previously purified by Ni-affinity chromatography. (AU – absorbance units). b. SDS PAGE analysis of the peak fractions from a. The indicated fractions were pooled and used for activity assays. c. Size exclusion chromatogram of TslA<sub>NT</sub>-containing fractions that had been previously purified by Ni-affinity chromatography. d. SDS



PAGE analysis of the two peak fractions from c. Fractions from peak b were pooled and used for activity assays. e-g. Tween 20 activity assays (carried out as described in the methods) with TslA, TslA amino acid substituted variants or TslA<sub>NT</sub> as indicated. Experiments were performed in technical and biological triplicates. Data is presented as the mean  $\pm$  SD. The experiments were performed three times with similar results. h. Circular dichroism spectra for purified TslA and the S164A, D224A and H251A variants.

a.

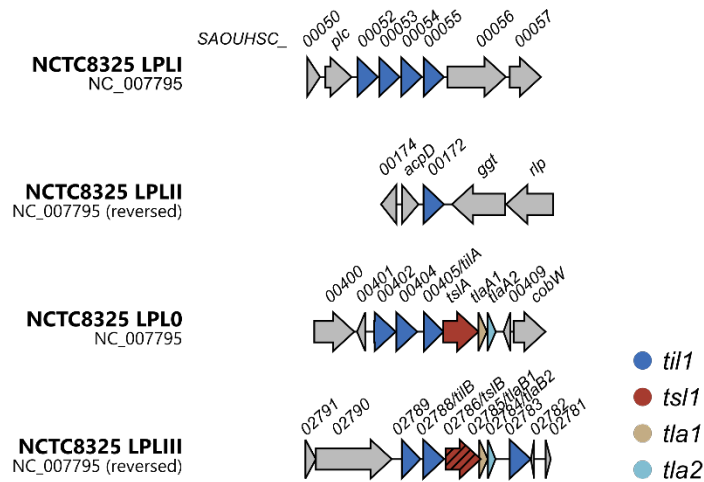

b.

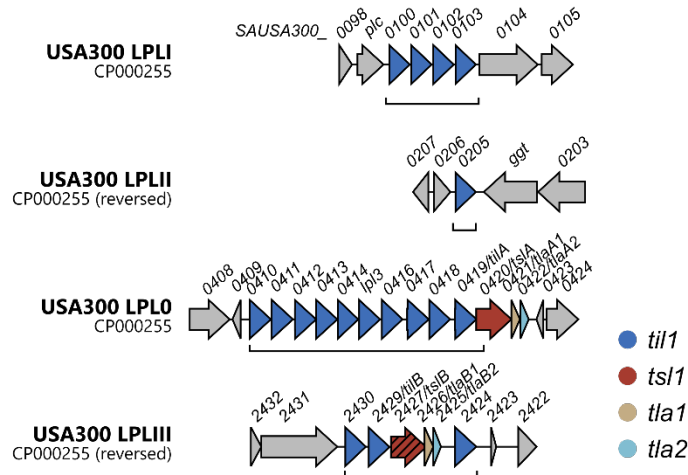

**Supplementary Fig. 7. *S. aureus* strains encode three DUF576 tandem lipoprotein (Til1) islands and one orphan Til1.** Til1 proteins are encoded at four loci in *S. aureus* genomes<sup>18</sup>. a. The loci shown here are from the NCTC8325 genome. The hatched shading indicates a probable pseudogene. Gene diagrams were visualised in Clinker<sup>19</sup>. b. The four Til1 loci from USA300 are depicted here. Black lines indicate genes deleted in the *til1*-deficient mutant.

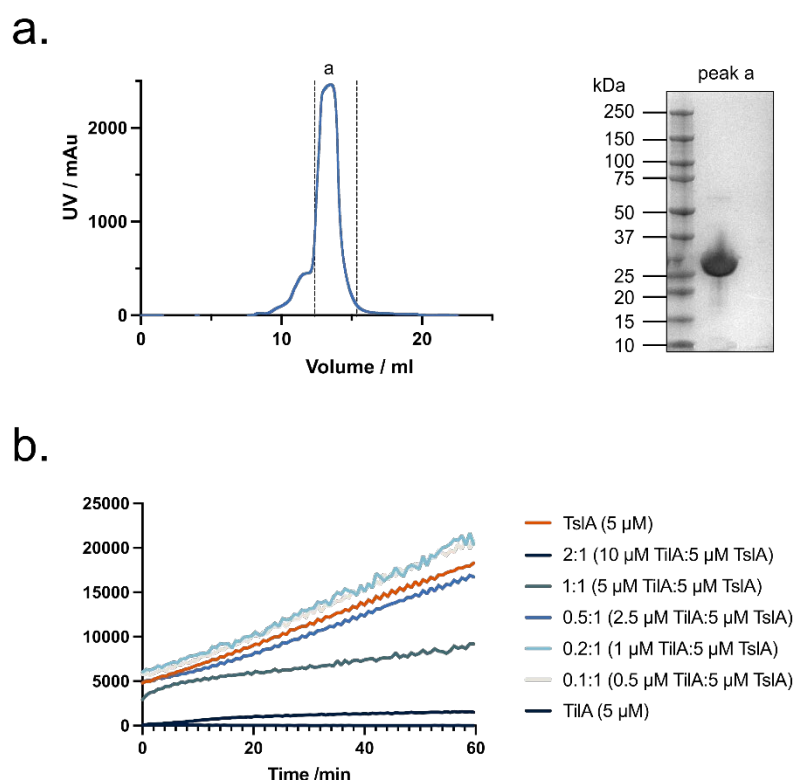

**Supplementary Fig. 8. The TiIA immunity protein inhibits TsIA lipase activity.** a, Size exclusion chromatogram of TiIA-containing fractions that had been previously purified by Ni-affinity chromatography (left) and SDS PAGE analysis of the peak fraction (right). b, Purified TsIA alone, TiIA alone or TsIA and TiIA at the indicated molar ratios were incubated with the PLA<sub>2</sub> substrate PED6. Fluorescence released upon substrate hydrolysis was measured at 515 nm over the course of 1 h, and negative control values were subtracted from each condition.

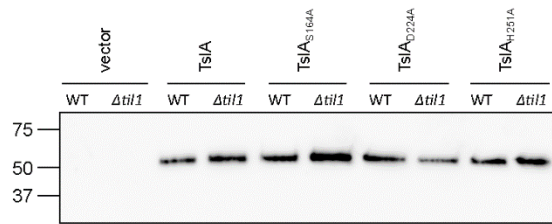

**Supplementary Fig. 9. TslA and catalytically inactive variants are produced at similar levels in USA300 strains.** USA300 and the isogenic *til1* mutant carrying pRAB11 (vector) or pRAB11 encoding TlaA1 and TlaA2 alongside the indicated variant of TslA were grown for 2 h post induction in TSB supplemented with 5 mM  $\text{CaCl}_2$ . The equivalent of 1 ml of culture of  $\text{OD}_{600} = 1$  was withdrawn from each, pelleted and resuspended in PBS containing 1 mg ml<sup>-1</sup> lysostaphin. Samples were incubated at 37°C for 30 min and boiled for 10 min in 2 X Laemmli buffer before analysis by SDS PAGE and Western blotting with anti-TslA antibodies.

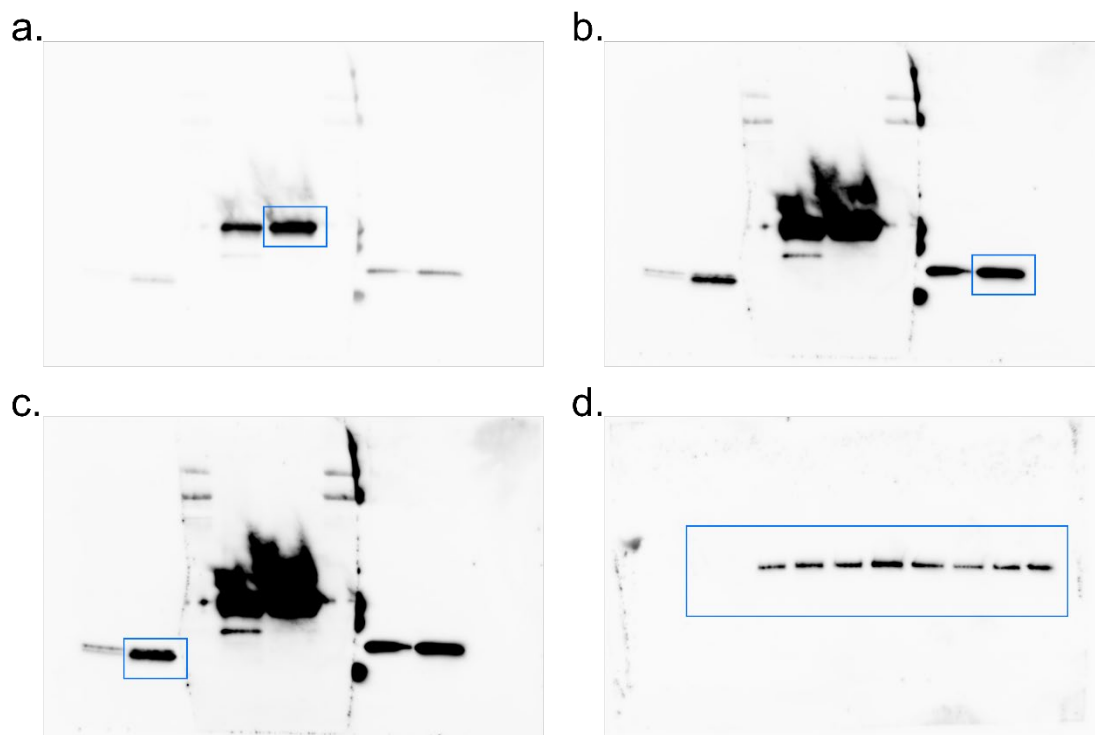

**Supplementary Fig. 10. Uncropped Western blots.** Purified fractions containing His-TsIA<sub>(277-442)</sub>, TlaA1-Strep and TlaA2-Myc following size exclusion chromatography were electrophoresed on a 4-20% SDS gel in triplicate, separated by a protein standard marker, and subsequently transferred to a nitrocellulose membrane, as shown in Fig. 2f. The membrane was cut at each of the two protein standards and each of membranes incubated with either TsIA, Strep or Myc antibodies, as described in the methods. The membranes were placed together for imaging with a. 15 s, b. 4 min 30 s and c. 9 min exposure images used for TsIA, Strep and Myc, respectively. d. Uncropped image of the TsIA blot in Supplementary Fig. 9.

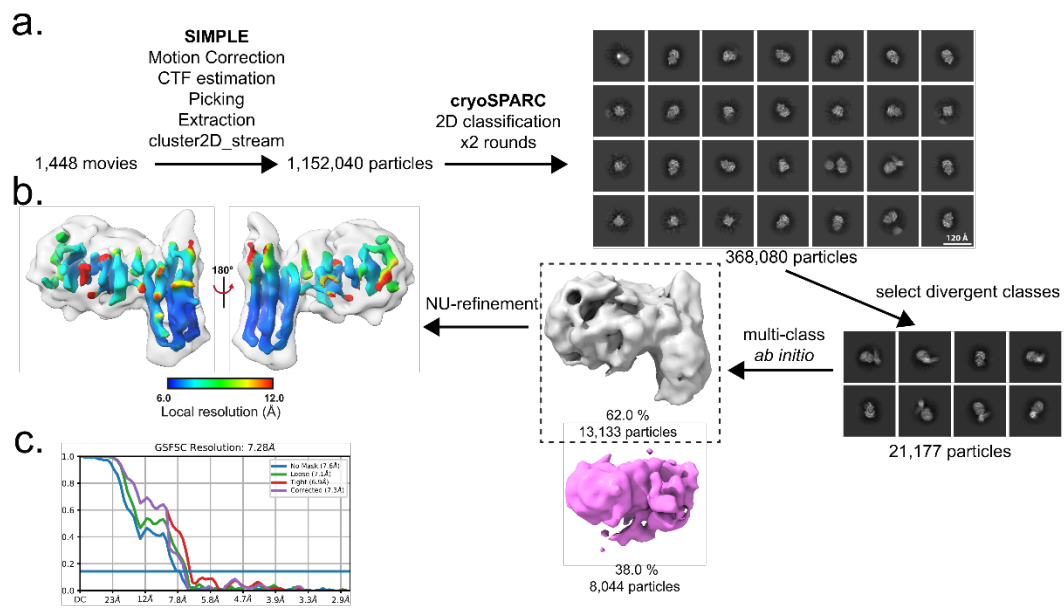

**Supplementary Fig. 11. Cryo-EM processing workflow, showing local and global map quality.** a, Image processing workflow. b, Local-resolution estimation of reconstructed map as determined within cryoSPARC. Map in transparent grey is shown at low contour level, whereas rainbow coloured map has been sharpened with a B-factor of -786 and displayed at higher contour level to show secondary structure elements. c, Gold-standard FSC curves used for global-resolution estimate as determined within cryoSPARC.

|                           | Number of strains<br>with full length toxin<br>Present | Number of strains<br>with toxin<br>pseudogene present | Number of strains<br>with toxin absent | Number of strains<br>excluded due to<br>lack of coverage |
|---------------------------|--------------------------------------------------------|-------------------------------------------------------|----------------------------------------|----------------------------------------------------------|
| TslA                      | 289                                                    | 79                                                    | 0                                      | 135                                                      |
| % of strains with<br>TslA | 78.5                                                   | 21.5                                                  | 0                                      |                                                          |
| TslB                      | 244                                                    | 155                                                   | 192                                    | 363                                                      |
| % of strains with<br>TslB | 41.3                                                   | 26.2                                                  | 32.5                                   |                                                          |
| TslC                      | 70                                                     | 5                                                     | 451                                    | 52                                                       |
| % of strains with<br>TslC | 13.3                                                   | 1.0                                                   | 85.7                                   |                                                          |

**Supplementary Table 1. Analysis of TslI distribution in *S. aureus* genomes.** To assess the distribution of TslA, TslB and TslC across *S. aureus* strains, a conserved protein encoded at each of the LPL0 (SAOUHSC\_00400), LPLIII (SAOUHSC\_02790) and LPLI loci (SAOUHSC\_00056), respectively, were searched against all *S. aureus* strains present in the RefSeq database. The output was filtered for >90% percent identity and coverage with the query sequence, to ensure the correct locus was selected, and the accession list submitted for flanking gene analysis using webFlags<sup>1</sup>. The toxin was recorded as present if an open reading frame was detected in the webFlags output, as pseudogenised if predicted to be a pseudogene by webFlags and absent if the toxin was not found between the conserved genes at either end of the LPL locus. If the contig was too short or if the conserved flanking genes for the locus were not present, the contig was excluded.

|                                           | USA300<br>positive<br>control | USA300<br>negative<br>control | USA300<br>TslA-<br>TlaA1-<br>TlaA2 | USA300<br>$\Delta$ til1<br>positive<br>control | USA300<br>$\Delta$ til1<br>negative<br>control | USA300<br>$\Delta$ til1 TslA-<br>TlaA1-TlaA2 |
|-------------------------------------------|-------------------------------|-------------------------------|------------------------------------|------------------------------------------------|------------------------------------------------|----------------------------------------------|
| Total cells                               | 1216                          | 680                           | 1538                               | 1346                                           | 735                                            | 864                                          |
| Total cells<br>with<br>membrane<br>damage | 560                           | 8                             | 3                                  | 905                                            | 1                                              | 179                                          |
| Percentage<br>cells<br>membrane<br>damage | 46.05                         | 1.18                          | 0.20                               | 67.24                                          | 0.14                                           | 20.72                                        |

**Supplementary Table 2. Analysis of *S. aureus* USA300 cells stained by Sytox green when imaged using fluorescence microscopy.** The percentage cells stained with Sytox green was calculated for each strain from the total cells analysed, as described in the methods. Data is represented in Fig. 5e.



| Strain                             | Relevant genotype or description                                                                                                      | Source or reference    |
|------------------------------------|---------------------------------------------------------------------------------------------------------------------------------------|------------------------|
| <i>E. coli</i>                     |                                                                                                                                       |                        |
| JM110                              | <i>rpsL thr leu thi lacY galK galT ara tonA tsx dam dcm glnV44 Δ(lac-proAB) e14- [F' traD36 proAB+ lacIq lacZΔM15] hsdR17(rK-mK+)</i> | Stratagene             |
| TOP10                              | <i>F- mcrA (mrr-hsdRMS-mcrBC) 80lacZ M15 lacX74 recA1 ara 139 (ara-leu)7697 galU galK rpsL (Str<sup>r</sup>) endA1 nupG</i>           | Invitrogen             |
| BL21(DE3)                          | <i>E. coli B: F<sup>-</sup>, dcm, ompT, hsdS(rB<sup>-</sup>, mB<sup>-</sup>), gal, λ(DE3)</i>                                         | Reference <sup>2</sup> |
| M15 [pREP4]                        | <i>F<sup>-</sup>, lac, ara, gal, mtl, [Kan<sup>r</sup>, lacI]</i>                                                                     | Qiagen                 |
| BTH101                             | <i>F<sup>-</sup> cya-99, araD139, galE15, galK16, rpsL1 (Str<sup>r</sup>), hsdR2, mcrA1, mcrB1</i>                                    | Reference <sup>3</sup> |
| DH5a                               | <i>φ80d Δ(lacZ)M15 recA1 endA1 gyrA96 thi-1 hsdR17 (rk-mk+) supE44 relA1 deoR Δ(lacZYA-argF)U169</i>                                  | Promega                |
| <i>S. aureus</i>                   |                                                                                                                                       |                        |
| RN6390                             | NCTC8325 derivative, <i>rbsU</i> , <i>tcaR</i> , cured of φ11, φ12, φ13                                                               | Reference <sup>4</sup> |
| USA300 LAC                         | Wild type                                                                                                                             | Reference <sup>5</sup> |
| USA300 Δ <i>essC</i>               | In-frame deletion of <i>essC</i> from USA300 LAC                                                                                      | This work              |
| USA300 Δ <i>tsiA</i>               | In-frame deletion of <i>tsiA</i> from USA300 LAC                                                                                      | This work              |
| USA300 Δ <i>til1</i>               | Also named <i>S. aureus</i> USA300 Δ <i>lplΔlpp3Δlpp4Δcsa1</i> . In-frame deletions of all four LPL loci.                             | Reference <sup>6</sup> |
| USA300 Δ <i>til1</i> Δ <i>essC</i> | In-frame deletion of <i>essC</i> from USA300 Δ <i>til1</i>                                                                            | This work              |
| USA300 Δ <i>til1::tilA</i>         | As USA300 Δ <i>til1</i> , with a copy of <i>tilA</i> introduced between SAOUHSC_00037 and SAOUHSC_00039 using pTH100_ <i>tilA</i> .   | This Work              |

**Supplementary Table 3.** Bacterial strains used in this work.

| Plasmid                                                                  | Relevant genotype or description                                                                                                                                                                                     | Source or reference     |
|--------------------------------------------------------------------------|----------------------------------------------------------------------------------------------------------------------------------------------------------------------------------------------------------------------|-------------------------|
| pIMAY                                                                    | <i>E. coli</i> / <i>S. aureus</i> shuttle vector, temperature sensitive, <i>cml</i> <sup>r</sup>                                                                                                                     | Reference <sup>7</sup>  |
| pIMAY-essC                                                               | pIMAY carrying <i>essC</i> deletion allele                                                                                                                                                                           | Reference <sup>8</sup>  |
| pIMAY-Z                                                                  | <i>E. coli</i> / <i>S. aureus</i> shuttle vector, temperature sensitive, <i>cml</i> <sup>r</sup>                                                                                                                     | Reference <sup>9</sup>  |
| pIMAY-Z- <i>tslA</i>                                                     | pIMAY carrying <i>tslA</i> deletion allele                                                                                                                                                                           | This work               |
| pTH100                                                                   | Plasmid for markerless integration of GFP into <i>S. aureus</i>                                                                                                                                                      | Reference <sup>10</sup> |
| pTH100- <i>tilA</i>                                                      | As pTH100 but <i>gfp</i> replaced by <i>tilA</i> , including its native ribosome binding site (rbs)                                                                                                                  | This work               |
| pRAB11                                                                   | <i>E. coli</i> / <i>S. aureus</i> shuttle vector, inducible protein expression, <i>amp</i> <sup>r</sup> , <i>cml</i> <sup>r</sup>                                                                                    | Reference <sup>11</sup> |
| pRAB11- <i>TslA</i>                                                      | pRAB11 encoding <i>tslA</i> , preceded by <i>hla</i> rbs                                                                                                                                                             | This work               |
| pRAB11- <i>TslA</i> - <i>TlaA1</i> - <i>TlaA2</i>                        | pRAB11 encoding <i>tslA</i> - <i>tlaA1</i> - <i>tlaA2</i> . The <i>hla</i> rbs precedes <i>tslA</i>                                                                                                                  | This work               |
| pRAB11-pep86_ <i>TslA</i> - <i>TlaA1</i>                                 | As pRAB11 encoding <i>tslA</i> - <i>tlaA1</i> - <i>tlaA2</i> , with the <i>tlaA2</i> gene deleted. <i>TslA</i> fused to an N-terminal pep86 tag. The <i>hla</i> rbs precedes <i>tslA</i> . Synthesised by GenScript. | This work               |
| pRAB11-pep86_ <i>TslA</i> - <i>TlaA2</i>                                 | As pRAB11 encoding <i>tslA</i> - <i>tlaA1</i> - <i>tlaA2</i> , with the <i>tlaA1</i> gene deleted. <i>TslA</i> fused to an N-terminal pep86 tag. The <i>hla</i> rbs precedes <i>tslA</i> . Synthesised by GenScript. | This work               |
| pRAB11- <i>TslA</i> <sub>S164A</sub> - <i>TlaA1</i> - <i>TlaA2</i>       | As pRAB11- <i>TslA</i> - <i>TlaA1</i> - <i>TlaA2</i> but encoding <i>TslA</i> S164A substitution                                                                                                                     | This work               |
| pRAB11- <i>TslA</i> <sub>D224A</sub> - <i>TlaA1</i> - <i>TlaA2</i>       | As pRAB11- <i>TslA</i> - <i>TlaA1</i> - <i>TlaA2</i> but encoding <i>TslA</i> D224A substitution                                                                                                                     | This work               |
| pRAB11- <i>TslA</i> <sub>H251A</sub> - <i>TlaA1</i> - <i>TlaA2</i>       | As pRAB11- <i>TslA</i> - <i>TlaA1</i> - <i>TlaA2</i> but encoding <i>TslA</i> H251A substitution.                                                                                                                    | This work               |
| pRAB11-pep86_ <i>TslA</i> <sub>L312A</sub> - <i>TlaA1</i> - <i>TlaA2</i> | As pRAB11- <i>TslA</i> - <i>TlaA1</i> - <i>TlaA2</i> but encoding <i>TslA</i> L312A substitution. <i>TslA</i> fused to an N-terminal pep86 tag. Synthesised by GenScript.                                            | This work               |
| pRAB11-pep86_ <i>TslA</i> <sub>G310A</sub> - <i>TlaA1</i> - <i>TlaA2</i> | As pRAB11- <i>TslA</i> - <i>TlaA1</i> - <i>TlaA2</i> but encoding <i>TslA</i> G310A substitution. <i>TslA</i> fused to an N-terminal pep86 tag. Synthesised by GenScript.                                            | This work               |
| pRAB11-pep86_ <i>TslA</i> <sub>G310S</sub> - <i>TlaA1</i> - <i>TlaA2</i> | As pRAB11- <i>TslA</i> - <i>TlaA1</i> - <i>TlaA2</i> but encoding <i>TslA</i> G310S substitution. <i>TslA</i> fused to an N-terminal pep86 tag. Synthesised by GenScript.                                            | This work               |
| pRAB11-pep86_ <i>EsxA</i>                                                | pRAB11 producing <i>EsxA</i> fused to an N-terminal pep86 tag. The <i>hla</i> rbs precedes <i>esxA</i>                                                                                                               | This Work               |
| pRAB11-pep86_ <i>TrxA</i>                                                | pRAB11 producing <i>TrxA</i> fused to an N-terminal pep86 tag. The <i>hla</i> rbs precedes <i>trxA</i>                                                                                                               | Reference <sup>12</sup> |
| pRAB11-pep86_ <i>TslA</i>                                                | pRAB11 producing <i>TslA</i> fused to an N-terminal pep86 tag. The <i>hla</i> rbs precedes <i>tslA</i> . Synthesised by GenScript.                                                                                   | This Work               |
| pRAB11-pep86_ <i>TslA</i> - <i>TlaA1</i> - <i>TlaA2</i>                  | pRAB11 encoding <i>tslA</i> - <i>tlaA1</i> - <i>tlaA2</i> , producing <i>TslA</i> fused to an N-terminal pep86 tag. The <i>hla</i> rbs precedes <i>tslA</i>                                                          | This Work               |
| pRAB11- <i>TslA</i> - <i>TlaA1</i> - <i>pep86</i> - <i>TlaA2</i>         | pRAB11 encoding <i>tslA</i> - <i>tlaA1</i> - <i>tlaA2</i> , producing <i>TlaA2</i> fused to an N-terminal pep86 tag. The <i>hla</i> ribosome binding site precedes both <i>tslA</i> and <i>tlaA2</i>                 | This Work               |
| pRAB11- <i>TslA</i> - <i>TlaA1</i> - <i>pep86</i> - <i>TlaA2</i>         | pRAB11 encoding <i>tslA</i> - <i>tlaA1</i> - <i>tlaA2</i> , producing <i>TlaA1</i> fused to an C-terminal pep86 tag. The <i>hla</i> rbs precedes <i>tslA</i> . Synthesised by GenScript.                             | This work               |
| pRAB11-pep86_ <i>TslA</i> <sub>S164A</sub> - <i>TlaA1</i> - <i>TlaA2</i> | As pRAB11- <i>TslA</i> - <i>TlaA1</i> - <i>TlaA2</i> but encoding <i>TslA</i> S164A substitution. <i>TslA</i> fused to an N-terminal pep86 tag.                                                                      | This work               |
| pRAB11-pep86_ <i>TslA</i> <sub>D224A</sub> - <i>TlaA1</i> - <i>TlaA2</i> | As pRAB11- <i>TslA</i> - <i>TlaA1</i> - <i>TlaA2</i> but encoding <i>TslA</i> D224A substitution. <i>TslA</i> fused to an N-terminal pep86 tag.                                                                      | This work               |
| pRAB11-pep86_ <i>TslA</i> <sub>H251A</sub> - <i>TlaA1</i> - <i>TlaA2</i> | As pRAB11- <i>TslA</i> - <i>TlaA1</i> - <i>TlaA2</i> but encoding <i>TslA</i> H251A substitution. <i>TslA</i> fused to an N-terminal pep86 tag.                                                                      | This work               |
| pRAB11- <i>TlaA1</i> - <i>pep86</i> - <i>TlaA2</i>                       | pRAB11 encoding <i>tlaA1</i> - <i>tlaA2</i> , producing <i>TlaA2</i> fused to an N-terminal pep86 tag. The <i>hla</i> ribosome binding site precedes both <i>tlaA1</i> and <i>tlaA2</i>                              | This Work               |
| pRAB11- <i>TlaA1</i> - <i>pep86</i> - <i>TlaA2</i>                       | pRAB11 encoding <i>tslA</i> - <i>tlaA1</i> - <i>tlaA2</i> , producing <i>TlaA1</i> fused to an C-terminal pep86 tag. The <i>hla</i> rbs precedes <i>tlaA1</i> .                                                      | This work               |
| pBAD-6H11S                                                               | Expression vector for purification of 11S                                                                                                                                                                            | Reference <sup>13</sup> |

|                                                     |                                                                                                                                                                                                 |                         |
|-----------------------------------------------------|-------------------------------------------------------------------------------------------------------------------------------------------------------------------------------------------------|-------------------------|
| pQE70                                               | Vector for regulatable protein overproduction in <i>E. coli</i> (T5 promoter). <i>amp<sup>r</sup></i>                                                                                           | Qiagen                  |
| pQE70-TsIA-His                                      | pQE70 with <i>tsIA</i> cloned in frame in the multiple cloning site to produce a C-terminal His(6)-tag fusion.                                                                                  | This Work               |
| pQE70-TsIAS <sub>164A</sub> -His                    | As pQE70-TsIA-His but encoding TsIA S164A substitution                                                                                                                                          | This Work               |
| pQE70-TsIAD <sub>224A</sub> -His                    | As pQE70-TsIA-His but encoding TsIA D224A substitution                                                                                                                                          | This Work               |
| pQE70-TsIAH <sub>521A</sub> -His                    | As pQE70-TsIA-His but encoding TsIA H521A substitution                                                                                                                                          | This Work               |
| pREP4                                               | <i>lacI kan<sup>r</sup></i>                                                                                                                                                                     | Qiagen                  |
| pLysS                                               | Encodes T7 lysozyme <i>cml<sup>r</sup></i>                                                                                                                                                      | Promega                 |
| pET15bTEV                                           | Overexpression plasmid, T7 promoter. Adds (His)6-tag and a TEV site to N-terminus of protein                                                                                                    | Reference <sup>14</sup> |
| pET15bTEV-TsIA <sub>CT</sub> -TlaA1-Strep-TlaA2-Myc | pET15bTEV producing TsIA lacking the first 276 amino acids as an N-terminal His(6)-fusion, alongside TlaA1 with a C-terminal strep tag and TlaA2 with a C-terminal Myc tag                      | This work               |
| pET15bTEV-His-TiIA-TsIA-TlaA1-Strep-TlaA2-Myc       | pET15bTEV producing TiIA lacking the first 39 amino acids as an N-terminal His(6)-tag fusion, alongside full length TsIA, TlaA1 with a C-terminal strep tag and TlaA2 with a C-terminal Myc tag | This work               |
| pET15bTEV-His-TiIA                                  | pET15bTEV producing TiIA lacking the first 40 amino acids as an N-terminal His(6)-tag fusion                                                                                                    | This Work               |
| pET15bTEV-His-TsIA <sub>NT(1-311)</sub>             | pET15bTEV producing the N-terminal domain of TsIA (aa 1 – 311) with an N-terminal His(6)-tag                                                                                                    | This Work               |
| pUT18                                               | Vector encoding T18 fragment of <i>B. pertussis</i> CyaA; <i>amp<sup>r</sup></i>                                                                                                                | Reference <sup>15</sup> |
| pUT18-NarG                                          | aa 1-42 of <i>E. coli</i> NarG fused to the N-terminus of T18 CyaA                                                                                                                              | Reference <sup>16</sup> |
| pUT18-TiIA                                          | Mature region of TiIA (i.e. lacking aa 1-24) fused to the N-terminus of T18 CyaA                                                                                                                | This Work               |
| pUT18-TsIA                                          | TsIA fused to the N-terminus of T18 CyaA                                                                                                                                                        | This Work               |
| pUT18-TsIA <sub>NT</sub>                            | N-terminal domain of TsIA (aa 1-260) fused to the N-terminus of T18 CyaA                                                                                                                        | This Work               |
| pUT18-TsIA <sub>CT</sub>                            | C-terminal domain of TsIA (aa 239-442) fused to the N-terminus of T18 CyaA                                                                                                                      | This Work               |
| pUT18-TlaA1                                         | TlaA1 fused to the N-terminus of T18 CyaA                                                                                                                                                       | This Work               |
| pUT18-TlaA2                                         | TlaA2 fused to the N-terminus of T18 CyaA                                                                                                                                                       | This Work               |
| pT25                                                | Vector encoding T25 fragment of <i>B. pertussis</i> CyaA <i>cml<sup>r</sup></i>                                                                                                                 | Reference <sup>17</sup> |
| pT25-NarJ                                           | <i>E. coli</i> NarJ fused to the C-terminus of T25 CyaA                                                                                                                                         | Reference <sup>16</sup> |
| pT25-TiIA                                           | Mature region of TiIA (i.e. lacking aa 1-25) fused to the C-terminus of T25 CyaA                                                                                                                | This Work               |
| pT25-TsIA                                           | TsIA fused to the C-terminus of T25 CyaA                                                                                                                                                        | This Work               |
| pT25-TsIA <sub>NT</sub>                             | N-terminal domain of TsIA (aa 2-260) fused to the C-terminus of T25 CyaA                                                                                                                        | This Work               |
| pT25-TsIA <sub>CT</sub>                             | C-terminal domain of TsIA (aa 239-442) fused to the C-terminus of T25 CyaA                                                                                                                      | This Work               |
| pT25-TlaA1                                          | TlaA1 fused to the C-terminus of T25 CyaA                                                                                                                                                       | This Work               |
| pT25-TlaA2                                          | TlaA2 fused to the C-terminus of T25 CyaA                                                                                                                                                       | This Work               |

**Supplementary Table 4.** Plasmids used in this work.

| Protein                                        | Expression time | Sample application AC                                      | Buffer                                                                                                                           | Column                  |
|------------------------------------------------|-----------------|------------------------------------------------------------|----------------------------------------------------------------------------------------------------------------------------------|-------------------------|
| TslA (wildtype and point substituted variants) | 4 h             | 2.5 ml min <sup>-1</sup> supplemented with 20 mM imidazole | Buffer A: 50 mM HEPES pH 7.5<br>300 mM NaCl<br>Eluted with a gradient of 0 – 500 mM imidazole in Buffer A                        | 5 ml HisTrap FF         |
|                                                |                 |                                                            | Buffer B: 20 mM HEPES pH 7.5<br>150 mM NaCl                                                                                      | Superdex® 75 pg 16/600  |
| TslA <sub>CT</sub> -TlaA1-TlaA2                | 4 h             | 2 ml min <sup>-1</sup> supplemented with 50 mM imidazole   | Buffer A: 50 mM HEPES pH 8,<br>150 mM NaCl<br>Eluted with a gradient of 50 – 500 mM imidazole in Buffer A                        | 5 ml HisTrap FF         |
|                                                |                 |                                                            | Buffer A: 50 mM HEPES pH 8,<br>150 mM NaCl<br>Step elution with 5 mM <i>d</i> -desthiobiotin in Buffer A                         | 1ml StrepTrap, FF       |
|                                                |                 |                                                            | Buffer B: 50 mM HEPES pH 8,<br>150 mM NaCl                                                                                       | Superdex® 75 pg 16/600  |
| TilA-TslA-TlaA1-TlaA2                          | 2.5 h           | 0.5 ml min <sup>-1</sup> supplemented with 20 mM imidazole | Buffer A: 50 mM HEPES pH 7.5,<br>300 mM NaCl<br>Eluted with a gradient of 0 – 500 mM imidazole in Buffer A                       | 1 ml HisTrap, FF        |
|                                                |                 |                                                            | Buffer A: 50 mM HEPES pH 7.5,<br>300 mM NaCl<br>Step elution with 5 mM <i>d</i> -desthiobiotin in Buffer A                       | 1ml StrepTrap, FF       |
|                                                |                 |                                                            | Buffer B: 20 mM HEPES pH 7.5,<br>150 mM NaCl,                                                                                    | Superdex® 200 10/300 GL |
| TilA                                           | 2 h             | 2.5 ml min <sup>-1</sup> supplemented with 20 mM imidazole | Buffer A: 50 mM HEPES pH 7.5,<br>300 mM NaCl<br>Eluted with a gradient of 0 – 500 mM imidazole in Buffer A                       | 5 ml HisTrap, FF        |
|                                                |                 |                                                            | Buffer B: 20 mM HEPES pH 7.5,<br>150 mM NaCl                                                                                     | Superdex® 75 pg 10/300  |
| 11S-His                                        | 4 h             | 2.5 ml min <sup>-1</sup> supplemented with 50 mM imidazole | Buffer A: 20 mM Tris HCl pH 7.5,<br>50 mM KCl, 10% glycerol (v/v)<br>Eluted with a gradient of 50 – 550 mM imidazole in Buffer A | 5 ml HisTrap FF         |
|                                                |                 |                                                            | Buffer B: 50 mM HEPES pH 8,<br>150 mM NaCl                                                                                       | Superdex® 75 pg 16/600  |

**Supplementary Table 5.** Protein expression and purification conditions used in this work.

## Supplementary References

1. Saha, C.K., Sanches Pires, R., Brolin, H., Delannoy, M. & Atkinson, G.C. FlaGs and webFlaGs: discovering novel biology through the analysis of gene neighbourhood conservation. *Bioinformatics* **37**, 1312-1314 (2021).
2. Studier, F.W. & Moffatt, B.A. Use of bacteriophage T7 RNA polymerase to direct selective high-level expression of cloned genes. *J Mol Biol* **189**, 113-130 (1986).
3. Karimova, G., Ullmann, A. & Ladant, D. A bacterial two-hybrid system that exploits a cAMP signaling cascade in *Escherichia coli*. *Methods Enzymol* **328**, 59-73 (2000).
4. Novick, R.P. et al. Synthesis of *staphylococcal* virulence factors is controlled by a regulatory RNA molecule. *EMBO J* **12**, 3967-3975 (1993).
5. Kazakova, S.V. et al. A clone of methicillin-resistant *Staphylococcus aureus* among professional football players. *N Engl J Med* **352**, 468-475 (2005).
6. Belikova, D., Jochim, A., Power, J., Holden, M.T.G. & Heilbronner, S. "Gene accordions" cause genotypic and phenotypic heterogeneity in clonal populations of *Staphylococcus aureus*. *Nat Commun* **11**, 3526 (2020).
7. Monk, I.R., Shah, I.M., Xu, M., Tan, M.W. & Foster, T.J. Transforming the untransformable: application of direct transformation to manipulate genetically *Staphylococcus aureus* and *Staphylococcus epidermidis*. *mBio* **3**, e00277-11 (2012).
8. Kneuper, H. et al. Heterogeneity in *ess* transcriptional organization and variable contribution of the *Ess*/Type VII protein secretion system to virulence across closely related *Staphylococcus aureus* strains. *Mol Microbiol* **93**, 928-943 (2014).
9. Monk, I.R. & Stinear, T.P. From cloning to mutant in 5 days: rapid allelic exchange in *Staphylococcus aureus*. *Access Microbiol* **3**, 000193 (2021).
10. de Jong, N.W., van der Horst, T., van Strijp, J.A. & Nijland, R. Fluorescent reporters for markerless genomic integration in *Staphylococcus aureus*. *Sci Rep* **7**, 43889 (2017).
11. Helle, L. et al. Vectors for improved Tet repressor-dependent gradual gene induction or silencing in *Staphylococcus aureus*. *Microbiology* **157**, 3314-3323 (2011).
12. Yang, Y., Alcock, F., Kneuper, H. & Palmer, T. A high throughput assay to measure Type VII secretion in *Staphylococcus aureus*. *Biorxiv* <https://doi.org/10.1101/2023.06.03.543475> (2023).
13. Pereira, G.C. et al. A high-resolution luminescent assay for rapid and continuous monitoring of protein translocation across biological membranes. *J Mol Biol* **431**, 1689-1699 (2019).
14. Casabona, M.G. et al. Functional analysis of the *EsaB* component of the *Staphylococcus aureus* Type VII secretion system. *Microbiology* **163**, 1851-1863 (2017).
15. Karimova, G., Ullmann, A. & Ladant, D. Protein-protein interaction between *Bacillus stearothermophilus* tyrosyl-tRNA synthetase subdomains revealed by a bacterial two-hybrid system. *J Mol Microbiol Biotechnol* **3**, 73-82 (2001).

16. Ize, B. et al. Remnant signal peptides on non-exported enzymes: implications for the evolution of prokaryotic respiratory chains. *Microbiology* **155**, 3992-4004 (2009).
17. Karimova, G., Pidoux, J., Ullmann, A. & Ladant, D. A bacterial two-hybrid system based on a reconstituted signal transduction pathway. *Proc Natl Acad Sci U S A* **95**, 5752-5756 (1998).
18. Tsuru, T. & Kobayashi, I. Multiple genome comparison within a bacterial species reveals a unit of evolution spanning two adjacent genes in a tandem paralog cluster. *Mol Biol Evol* **25**, 2457-2473 (2008).
19. Gilchrist, C.L.M. & Chooi, Y.H. Clinker & clustermap.js: Automatic generation of gene cluster comparison figures. *Bioinformatics* **37**, 2473-2475 (2021).
